# Supplementary material for: Optogenetic modeling of human neuromuscular circuits in Duchenne muscular dystrophy with CRISPR and pharmacological corrections
Source: PubMed Central journal article supplement (PMC8442926; doi:10.1126/sciadv.abi8787), 2021-09-10
Supplement: sciadv.abi8787_sm.v2.pdf [file sciadv.abi8787_sm.v2.pdf]

## Supplementary Materials for

### **Optogenetic modeling of human neuromuscular circuits in Duchenne muscular dystrophy with CRISPR and pharmacological corrections**

Amaia Paredes-Redondo, Peter Harley, Eleni Maniati, David Ryan, Sandra Louzada, Jinhong Meng, Anna Kowala, Beiyuan Fu, Fengtang Yang, Pentao Liu, Silvia Marino, Olivier Pourquié, Francesco Muntoni, Jun Wang, Ivo Lieberam, Yung-Yao Lin\*

\*Corresponding author. Email: [yy.lin@qmul.ac.uk](mailto:yy.lin@qmul.ac.uk)

Published 10 September 2021, *Sci. Adv.* 7, eabi8787 (2021)

DOI: [10.1126/sciadv.abi8787](https://doi.org/10.1126/sciadv.abi8787)

#### **The PDF file includes:**

Figs. S1 to S6  
Tables S1 to S5  
Legends for movies S1 to S6  
Legends for data files S1 and S2

#### **Other Supplementary Material for this manuscript includes the following:**

Movies S1 to S6  
Data files S1 and S2

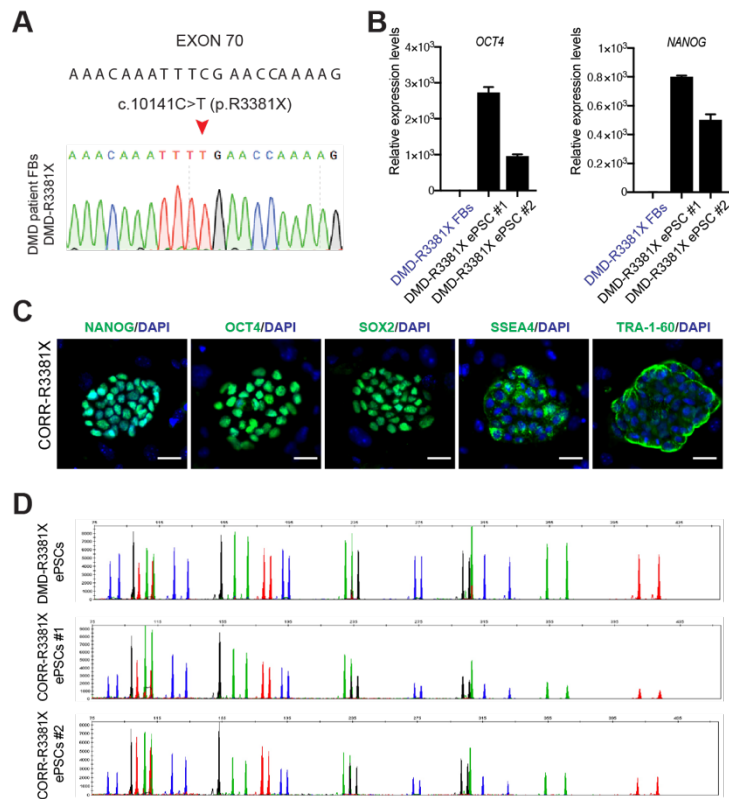

**Fig. S1. Characterization of a pair of DMD patient-derived and isogenic control ePSCs.**

(A) *DMD* c.10141C>T (p.R3381X) mutation confirmed by sequencing analysis in DMD patient's derived fibroblasts.

(B) Relative expression of *OCT4* and *NANOG* pluripotency markers in two independent DMD-R3381X ePSC clones. DMD fibroblasts did not express pluripotency genes. N=3, technical replicates, values are mean  $\pm$  SD,

(C) Positive immunocytochemistry of NANOG, OCT4, SOX2, SSEA4 and TRA-1-60 in CORR-R3381X ePSCs. Scale bars are 100  $\mu$ m.

(D) Microsatellite analysis confirmed common parental origin of the two independent CORR-R3381X ePSCs generated clones.

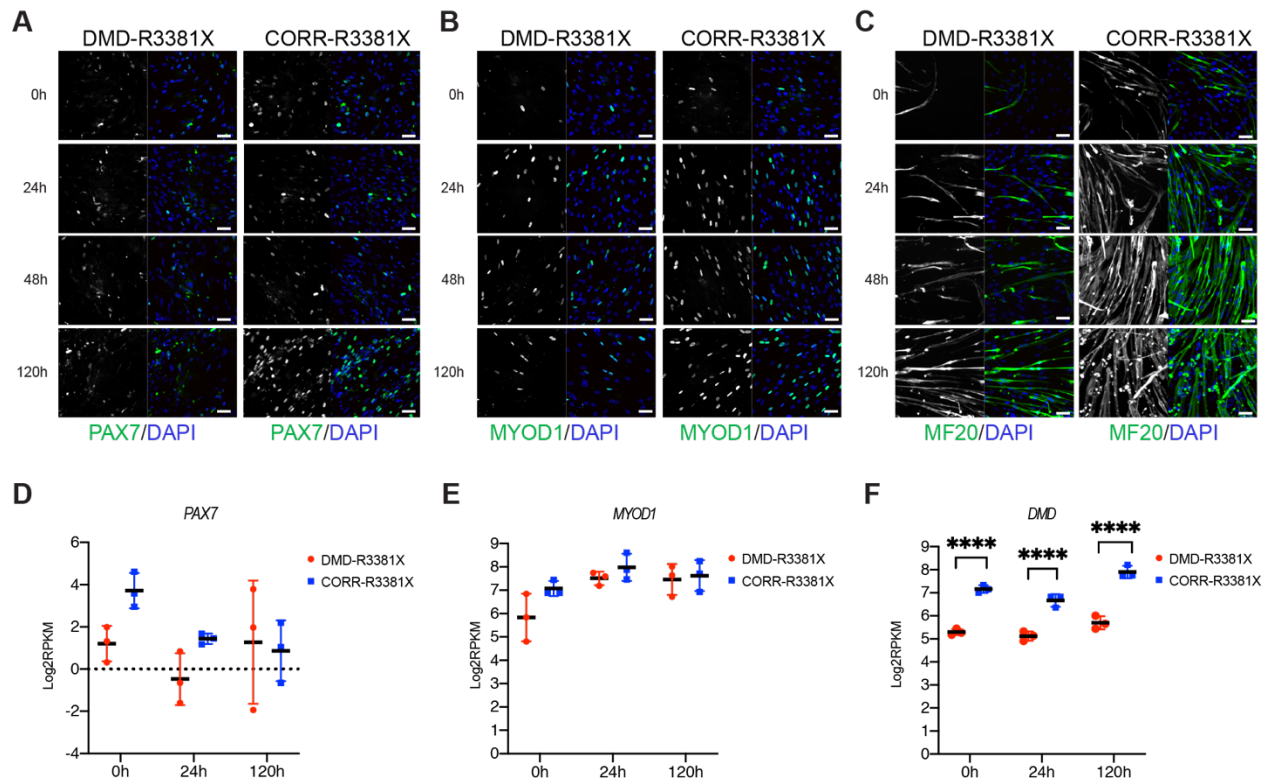

**Fig. S2. Expression of myogenic markers in DMD- and CORR-R3381X MPCs and myotubes.**

(A) Representative images of immunocytochemistry of PAX7 in DMD and CORR-R3381X MPCs and at 24, 48 and 120h in secondary differentiation medium. Scale bars are 50  $\mu$ m.

(B) Representative images of immunocytochemistry of MYOD1 in DMD and CORR-R3381X MPCs and at 24, 48 and 120h in secondary differentiation medium. Scale bars are 50  $\mu$ m.

(C) Representative images of immunocytochemistry of MYH stained with MF20 antibody in DMD and CORR-R3381X MPCs and at 24, 48 and 120h in secondary differentiation medium. Scale bars are 50  $\mu$ m.

(D) Log<sub>2</sub>RPKM values of *PAX7* gene do not significantly differ in DMD and CORR-R3381X muscle cells at MPCs (0h) stage, after 24 and 120h in secondary differentiation medium. N=3, values are mean  $\pm$  SD. Two-way ANOVA followed by Sidak's multiple comparisons test.

(E) Log<sub>2</sub>RPKM values of *MYOD1* gene follow a similar trend in DMD and CORR-R3381X muscle cells at MPCs (0h) stage, after 24 and 120h in secondary differentiation medium. N=3, values are mean  $\pm$  SD. Two-way ANOVA followed by Sidak's multiple comparisons test.

(F) Log<sub>2</sub>RPKM values are significantly lower in DMD-R3381X muscle cells at the three stages of secondary differentiation when compared with CORR-R3381X cells. N=3, values are mean ± SD. Two-way ANOVA followed by Sidak's multiple comparisons test, \*\*\*\*p < 0.0001.

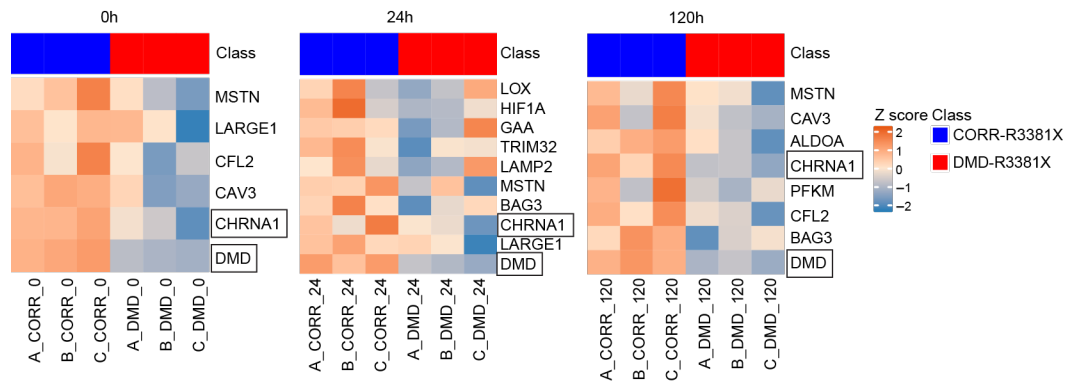

**Fig. S3.** Heatmaps of core enrichment genes in GO MUSCLE CELL CELLULAR HOMEOSTASIS at 0, 24 and 120 hours. Both *DMD* and *CHRNA1* are down-regulated in DMD-R3381X compared with CORR-R3381X.

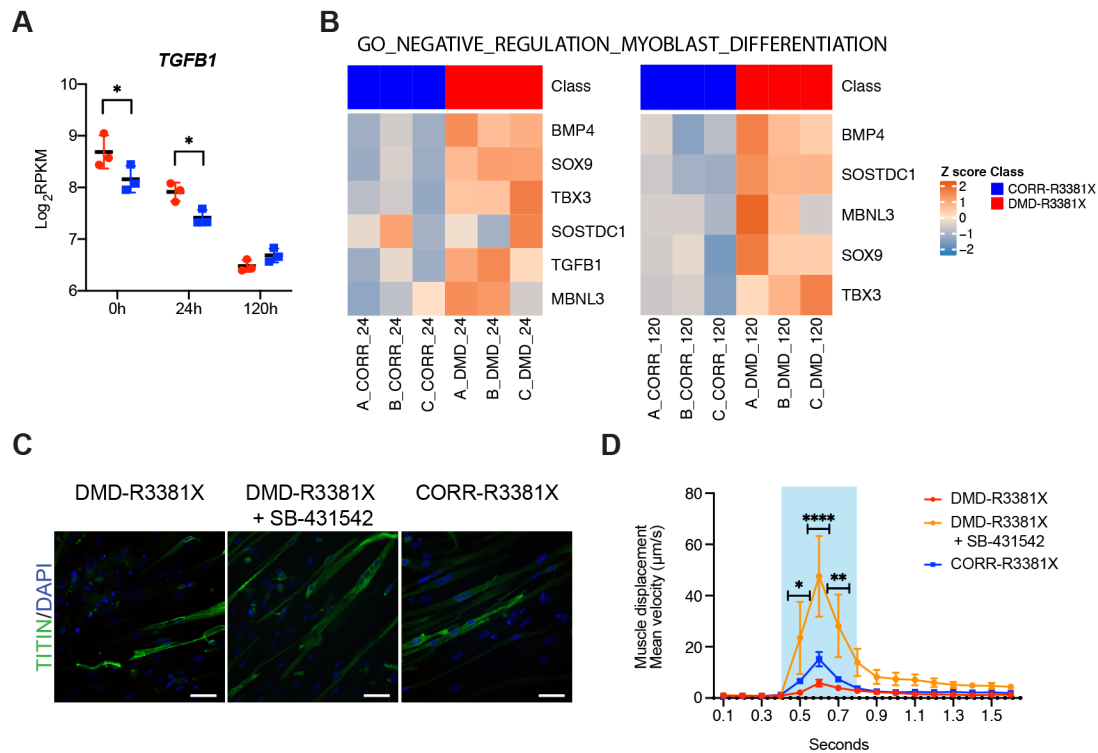

**Fig. S4. SB-431542 treatment of DMD-R3381X muscle cells during secondary differentiation**

(A) Log<sub>2</sub>RPKM values of *TGFBI* are significantly higher in DMD-R3381X MPCs during secondary differentiation. N=3, values are mean ± SD. Two-way ANOVA followed by Sidak's multiple comparisons test, \*p < 0.05.

(B) Heatmaps of core enrichment genes in GO NEGATIVE REGULATION OF MYOBLAST DIFFERENTIATION include *TGFBI* and genes involved in TGFβ signaling, which are up-regulated in DMD-R3381X at 24 and 120 hours of secondary differentiation.

(C) Representative images of immunocytochemistry for titin in 2D myogenic cultures of DMD-R3381X, DMD-R3381X treated with 10 µM SB-431542 and CORR-R3381X after 120h in secondary differentiation medium. Scale bars are 50 µm.

(D) Quantification of mean velocity of DMD-R3381X, DMD-R3381X + SB-431542 and CORR-R3381X myofibers upon optogenetic stimulation at day 5. The blue shading indicates the time during optogenetic stimulation. N=12. Values are mean ± SEM, Two-way ANOVA followed by Sidak's multiple comparisons test between DMD-R3381X + SB-431542 and CORR-R3381X samples. \*p < 0.05, \*\*p < 0.01, \*\*\*\*p < 0.0001. The data is the same as in Figure 4D and 4F.

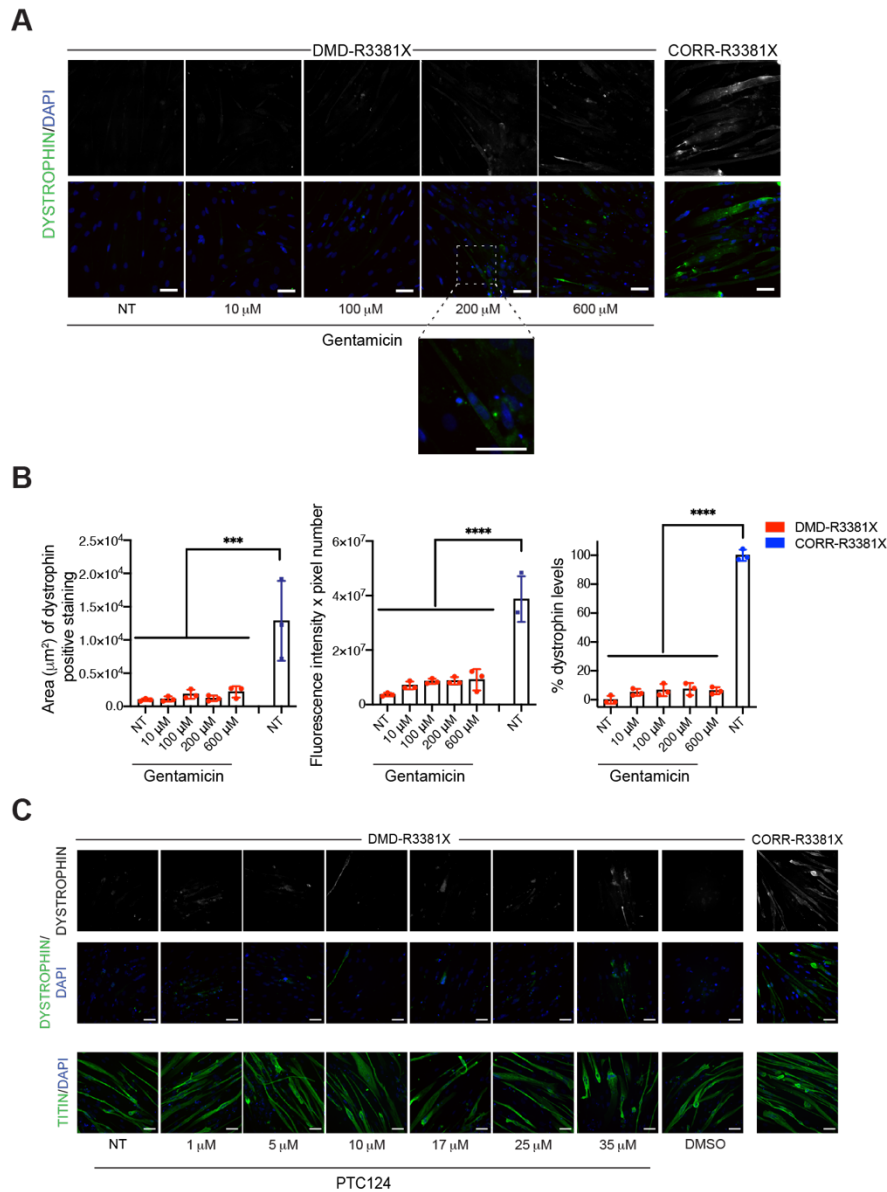

**Fig. S5. Gentamicin or PTC124 treatment of DMD-R3381X muscle cells during secondary differentiation**

(A) Representative immunocytochemistry images of dystrophin staining in DMD-R3381X, DMD-R3381X treated with a range of Gentamicin concentrations (10  $\mu$ M, 100  $\mu$ M, 200  $\mu$ M and 600  $\mu$ M) and CORR-R3381X cells after 120h in secondary differentiation medium. Scale bars are 50  $\mu$ m.

(B) Quantification of percentage of dystrophin-positive area, mean fluorescence intensity multiplied by pixel number and percentage of normalized dystrophin levels in gentamicin treated

conditions. NT, Not treated. N=3. Values are mean  $\pm$  SD. One-way ANOVA followed by Tukey's multiple comparisons test, \*\*\*p < 0.001, \*\*\*\*p < 0.0001.

(C) Representative immunocytochemistry images of dystrophin staining in DMD-R3381X, DMD-R3381X treated with a range of PTC124 concentrations (1  $\mu$ M, 5  $\mu$ M, 10  $\mu$ M, 17  $\mu$ M, 25  $\mu$ M and 35  $\mu$ M) and CORR-R3381X cells after 120h in secondary differentiation medium. Scale bars are 100  $\mu$ m.



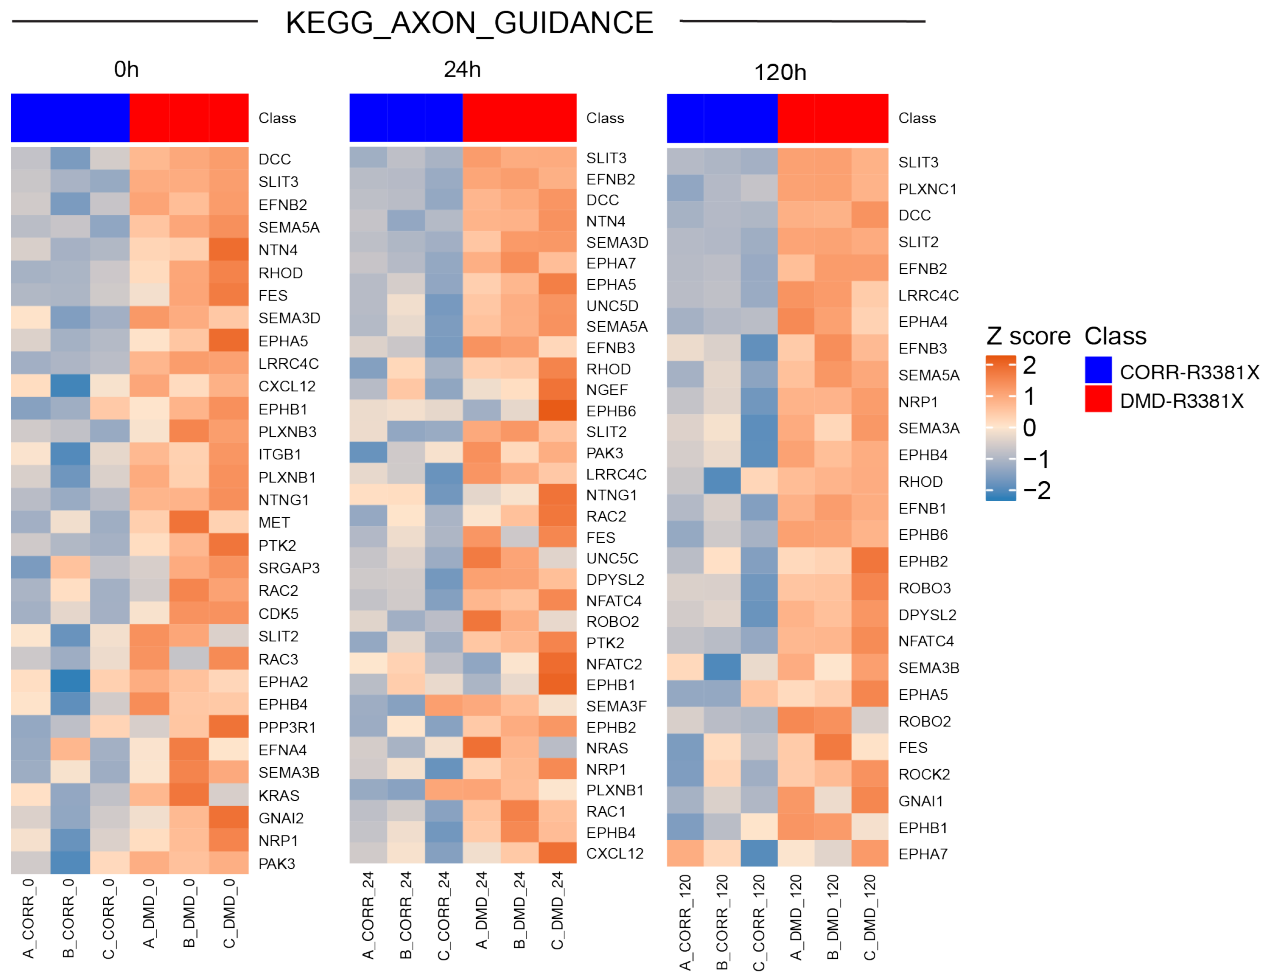

**Fig. S6.** Heatmaps illustrating log<sub>2</sub>RPKM gene expression (row z-scores) of core enrichment genes for KEGG AXON GUIDANCE at each individual time point, columns represent samples and rows represent genes.

**Table S1. Summary of DMD-R3381X patient’s mutation, symptoms and the reprogrammed ePSC line**

| <b>P1</b>                      |                                                                                                    |
|--------------------------------|----------------------------------------------------------------------------------------------------|
| Fibroblasts                    | FB763 (P4)                                                                                         |
| Mutation                       | c.10141C>T (p.R3381X)                                                                              |
| Exon                           | 70                                                                                                 |
| Ensembl variant ID             | rs104894790                                                                                        |
| Sex                            | Male                                                                                               |
| Age at biopsy                  | 6 years old                                                                                        |
| Muscular symptoms              | Frequent falls                                                                                     |
| Microscopic description        | Abnormal round fibre size, necrosis, increased internal nuclei, increase in fat/connective tissue, |
| Dystrophin immunocytochemistry | Absent                                                                                             |
| CK<br>Normal range<200 IU/L    | 10,000 IU/L                                                                                        |
| Brain symptoms                 | Severe learning difficulties                                                                       |
| Cardiac symptoms               | N/A                                                                                                |
| PSC type                       | ePSCs                                                                                              |
| PSC growth medium              | EPSCM                                                                                              |
| PSC line                       | DMD-R3381X                                                                                         |

**Table S2. Primary antibodies**

| <b>Antibodies</b>                         | <b>Species</b> | <b>Type</b> | <b>Isotype</b> | <b>Supplier</b>      | <b>Cat<br/>Number</b> | <b>Working<br/>Dilution</b> |
|-------------------------------------------|----------------|-------------|----------------|----------------------|-----------------------|-----------------------------|
| OCT4                                      | Mouse          | Monoclonal  | IgG2b          | Santa<br>Cruz        | sc-5279               | 1:100                       |
| NANOG                                     | Rabbit         | Polyclonal  | IgG            | Abcam                | AB80892               | 1:100                       |
| SOX2                                      | Mouse          | Monoclonal  | IgG2a          | R&D                  | MAB2018               | 1:100                       |
| TRA-1-60                                  | Mouse          | Monoclonal  | IgM            | Santa<br>Cruz        | sc-21705              | 1:100                       |
| SSEA4                                     | Mouse          | Monoclonal  | IgG3           | BD<br>Bioscience     | 560796                | 1:50                        |
| $\alpha$ -Smooth Muscle Actin             | Mouse          | Monoclonal  | IgG2a          | R&D                  | MAB1420               | 1:75                        |
| $\beta$ -III tubulin (TUBB3)              | Mouse          | Monoclonal  | IgG2a          | R&D                  | MAB1195               | 1:100                       |
| $\alpha$ -Fetoprotein                     | Mouse          | Monoclonal  | IgG1           | R&D                  | MAB1368               | 1:100                       |
| PAX7                                      | Mouse          | Monoclonal  | IgG1           | DSHB                 | N/A                   | 1:100                       |
| MYOD1                                     | Mouse          | Monoclonal  | IgG1           | Dako                 | M3512                 | 1:100                       |
| MYH (MF20)                                | Mouse          | Monoclonal  | IgG2b          | DSHB                 | N/A                   | 1:100                       |
| Titin                                     | Mouse          | Monoclonal  | IgM            | DSHB                 | N/A                   | 1:100                       |
| Dystrophin (Immunocytochemistry)          | Mouse          | Monoclonal  | IgG2a          | Millipore            | MABT827               | 1:50                        |
| Dystrophin (Immunoblotting)               | Rabbit         | Polyclonal  | IgG            | Fisher<br>Scientific | PA5-<br>32388         | 1:750                       |
| $\beta$ -Actin                            | Mouse          | Monoclonal  | IgG2a          | Sigma                | A5316                 | 1:5,000                     |
| Vinculin                                  | Mouse          | Monoclonal  | IgG1           | Sigma                | MAB3574               | 1:1000                      |
| Acetylcholine receptor, nicotinic, muscle | Rat            | Monoclonal  | IgG1           | DSHB                 | mAb 35                | 1:200                       |
| Synaptic vesicle glycoprotein 2A          | Mouse          | Monoclonal  | IgG1           | DSHB                 | SV2                   | 1:500                       |

**Table S3. Secondary antibodies**

| <b>Antibodies</b>            | <b>Species</b> | <b>Supplier</b>      | <b>Cat<br/>Number</b> | <b>Working<br/>Dilution</b> |
|------------------------------|----------------|----------------------|-----------------------|-----------------------------|
| Anti-mouse IgG1 488          | Goat           | Invitrogen           | A-21121               | 1:1,000                     |
| Anti-mouse IgG 488           | Goat           | Invitrogen           | A-28175               | 1:1,000                     |
| Anti-rabbit IgG 488          | Goat           | Invitrogen           | A-11034               | 1:1,000                     |
| Anti-mouse IgG2a 488         | Goat           | Invitrogen           | A-21131               | 1:1,000                     |
| Anti-mouse IgG2b 546         | Goat           | Invitrogen           | A-21143               | 1:1,000                     |
| Anti-rat IgG 555             | Goat           | Invitrogen           | A-21434               | 1:1,000                     |
| Anti-mouse IgM 594           | Goat           | Invitrogen           | A-21044               | 1:1,000                     |
| Anti-mouse IgG1 647          | Goat           | Invitrogen           | A-21240               | 1:1,000                     |
| IRDye 680RD Anti-mouse IgG   | Goat           | LI-COR<br>Bioscience | 926-68070             | 1:10,000                    |
| IRDye 800CW Anti- rabbit IgG | Donkey         | LI-COR<br>Bioscience | 926-32213             | 1:10,000                    |

**Table S4. RT-qPCR primers list**

| <b>Target Gene</b> | <b>Sequence (5'-3')</b>      |
|--------------------|------------------------------|
| <i>NANOG</i>       | F-AGAAAAACAACCTGGCCGAAGAAT   |
|                    | R-GTTGAATTGTTCCAGGTCTGGTT    |
| <i>OCT4</i>        | F-CACTGTACTCCTCGGTCCCTTTC    |
|                    | R-CAACCAGTTGCCCCAAACTC       |
| <i>TGFB1</i>       | F- TCGCCAGAGTGGTTATCTT       |
|                    | R- TAGTGAACCCGTTGATGTCC      |
| <i>MUSK</i>        | F- GCCTTCAGCGGAACTGAGAAA     |
|                    | R- GGCTGGGGGTAGGATTCCA       |
| <i>SLIT2</i>       | F- GACGACTGCCAAGACAACAA      |
|                    | R- TGATAGCCAGGCAAACACTG      |
| <i>SLIT3</i>       | F- AGCGCCTTGACCTGGACA        |
|                    | R- TCGGCGTGCTCTGGAAAA        |
| <i>ROBO2</i>       | F- GGGTTACTACATCTGCCAGGCTT   |
|                    | R- AGGTGGAGGTCTATCTGTCAAACAT |
| <i>EFNB2</i>       | F- GCAAGTTCTGCTGGATCAAC      |
|                    | R- AGGATGTTGTTCCCCGAATG      |
| <i>EPHB4</i>       | F- GTCTGACTTTGGCCTTTCCC      |
|                    | R- TGACATCACCTCCCACATCA      |
| <i>SEMA3D</i>      | F- TGGGACATCGAAGACAGCAT      |
|                    | R- AAAGTGTGCTCCTGGGCTTT      |
| <i>SEMA5A</i>      | F- GTCTATACTTACTGCCAGCG      |
|                    | R- GTTAAATGCCTTGATGGCCTC     |
| <i>ACTB</i>        | F- GCGAGAAGATGACCCAGATC      |
|                    | R- CCAGTGGTACGGCCAGAGG       |

**Table S5. Oligonucleotide primer sequences used to amplify the fragments for Gibson Assembly**

| Fragment           | Sequence (5'-3')                                                                                                                                                     | Product Length (bp) |
|--------------------|----------------------------------------------------------------------------------------------------------------------------------------------------------------------|---------------------|
| Left Arm           | F-CGCGCCGGTACCTTAATTAACCTAAATGCTAGGCATTTAC<br>R-GACTATCTTTCTAGGGTTAAGGAGAGTGTTGTGGTTGTGA                                                                             | 1,040               |
| Right Arm (1)      | F-TGATCTCACCATGATCTCCCTTTTAGACTACATCAGGAGAAG<br>ATGTTGAGACTTTGCCAAGGTAATAAAAAACAATTT <u>C</u> GAA<br>CCAAAAGGTATTTTGC<br>R-GGGGATCCACTAGTTCTAGAGCAGCACCCCTTCAGCAAAAA | 950                 |
| Right Arm (2)      | F-GATTATCTTTCTAGGGTTAATTACAAAACAAGTGTCATGGG<br>GCAGAAGACTGGAGTGGTCATTAGTTTTGAAATCATCCTGT<br>CCTAAATCTGATCTCACC<br>R-GGGGATCCACTAGTTCTAGAGCAGCACCCCTTCAGCAAAAA        | 1,040               |
| Backbone Vector    | F-TTTTTGCTGAAGGGTGCTGCTCTAGAACTAGTGGATCCCC<br>R-GTAAATGCCTAGCATTTAGTTTAATTAAGGTACCGGCGCG                                                                             | 3,013               |
| Selection Cassette | F-TCACAACCACAACACTCTCCTTAACCCTAGAAAGATAGTC<br>R-CCATGACACTTGTTTTGTAATTAACCCTAGAAAGATAATC                                                                             | 3,277               |

Right arm (1) primer was used to introduce the corrected base (green underlined).

**Other Supplementary Materials for this manuscript include the following:**

**Movie S1.** DMD-R3381X contraction video\_S1 for Fig 3

**Movie S2.** CORR-R3381X contraction video\_S2 for Fig 3

**Movie S3.** DMD-R3381X contraction video\_S3 for Fig 4

**Movie S4.** DMD-R3381X + SB-431542 contraction video\_S4 for Fig 4

**Movie S5.** CORR-R3381X contraction video\_S5 for Fig 4

**Movie S6.** CORR-R3381X + SB-431542 contraction video\_S6 for Fig 4

**Data S1.** gsea\_report\_Mut\_vs\_Ctrl\_cp

**Data S2.** gsea\_report\_Mut\_vs\_Ctrl\_gobp
